# Supplementary material
Source: PubMed Central journal article supplement (PMC3272290)
Supplement: cc1023_4098SD1.pdf [file cc1023_4098SD1.pdf]

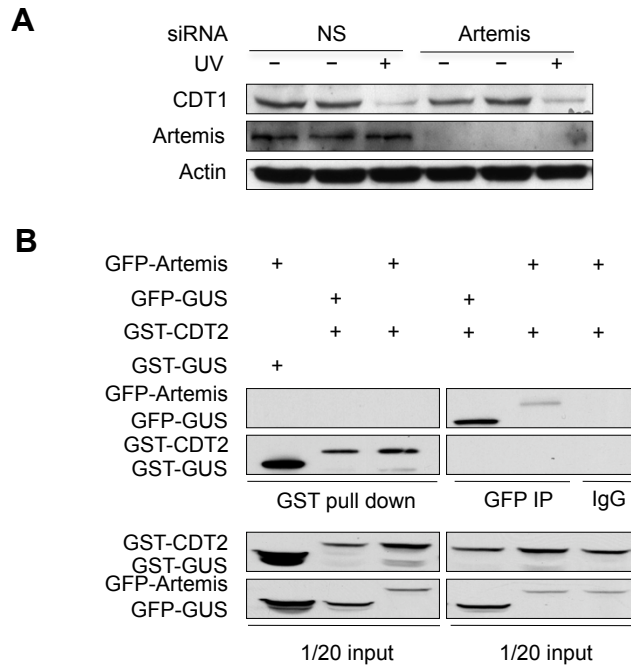

Figure S1. Artemis is not a regulator of the Cul4A-DDB1 substrate CDT1. (A) UV-induced CDT1 is not affected by Artemis depletion. HeLa cells were transfected with control (NS) or Artemis siRNAs, and 48 hours later cells were treated with or without 20 J/m<sup>2</sup>. After a 2-hour incubation cells were harvested for immunoblot analysis. Actin is shown as a loading control. (B) Artemis does not interact with CDT2. The indicated constructs were transfected into HeLa cells, and 48 hours later cells were harvested for GST pull-down and GFP co-IP assays. Anti-GFP and anti-GST antibodies were used to detect the indicated proteins.
